# Supplementary material for: Macro-Determinants of NEET: An Ecological Study at the Country Level of Analysis for the Period 1997–2020
Source: MDPI journal article supplement (doi:10.3390/youth2030028), 2022-09-05
Supplement: s1 [file s1]

Archive with 1 entries (1 files):
- youth-1883804-supplementary.pdf
